# Supplementary material for: Identification of Marker Peptides for the Whey Protein Quantification in Edam-Type Cheese
Source: MDPI journal article supplement (doi:10.3390/foods12102002), 2023-05-15
Supplement: s1 [file s1]

## Supplementary Material

### Identification of Marker Peptides for the Whey Protein Quantification in Edam-Type Cheese

Tobias von Oesen, Mascha Treblin, Ingrid Clawin-Rädecker, Dierk Martin, Ronald Maul, Wolfgang Hoffmann, Katrin Schrader, Benjamin Wegner, Katja Bode, Ralf Zink, Sascha Rohn, and Jan Fritsche

#### Contents

|           |                                                                                                                                                       |
|-----------|-------------------------------------------------------------------------------------------------------------------------------------------------------|
| Table S1  | Overview of the volumes used for peptide spiking in duplicate and measured once.                                                                      |
| Table S2  | Preparation of the synthetic peptide standard mixture (according to the peptide spiking levels mentioned in Table S1) in duplicate and measured once. |
| Table S3  | Spiking of CPBS with MPSM prior to tryptic hydrolysis.                                                                                                |
| Table S4  | Overview of the sample volumes used for the tryptic hydrolyses of the spiking experiments (Table S3).                                                 |
| Figure S1 | Peak areas of tryptic <i>in-vitro</i> generated PMPs for $\alpha$ -LA or $\beta$ -LG throughout the cheese ripening process of sample set I.          |
| Figure S2 | Peak areas of tryptic <i>in-vitro</i> generated PMPs for $\alpha$ -LA or $\beta$ -LG throughout the cheese ripening process of sample set II.         |
| Figure S3 | Peak areas of PMPs as a function of the amount of HH milk in cheese milk for sample set I and sample set II.                                          |

**Table S1.** Overview of the volumes used for peptide spiking in duplicate and measured once.

| Sample                        | Hydrolysate [ $\mu\text{L}$ ] | Added synthetic peptide standard mixture [ $\mu\text{L}$ ] | Water [ $\mu\text{L}$ ] |
|-------------------------------|-------------------------------|------------------------------------------------------------|-------------------------|
| Hydrolysates of CPBS and MPSM | 300                           | 0                                                          | 300                     |
| Peptide spiking level 1       | 300                           | 150                                                        | 150                     |
| Peptide spiking level 2       | 300                           | 225                                                        | 75                      |
| Peptide spiking level 3       | 300                           | 300                                                        | 0                       |

**Table S2.** Preparation of the synthetic peptide standard mixture (according to the peptide spiking levels mentioned in Table S1) in duplicate and measured once.

| Peptide spiking level | Synthetic peptide standard mixture [ $\mu\text{L}$ ] | Water [ $\mu\text{L}$ ] |
|-----------------------|------------------------------------------------------|-------------------------|
| 1                     | 150                                                  | 450                     |
| 2                     | 225                                                  | 375                     |
| 3                     | 300                                                  | 300                     |

**Table S3.** Spiking of CPBS with MPSM.

| Spiking level | CPBS [ $\mu\text{L}$ ] | MPSM [ $\mu\text{L}$ ] | Water [ $\mu\text{L}$ ] |
|---------------|------------------------|------------------------|-------------------------|
| 1             | 50                     | 50                     | 100                     |
| 2             | 50                     | 100                    | 50                      |
| 3             | 50                     | 150                    | 0                       |

**Table S4.** Overview of the sample volumes used for tryptic hydrolysis.

| Sample          | Volume used for hydrolysis [ $\mu\text{L}$ ] | Volume of CPBS present in sample volume of the spiked samples [ $\mu\text{L}$ ] | Volume of MPSM present in sample volume of the spiked samples [ $\mu\text{L}$ ] | Water [ $\mu\text{L}$ ] |
|-----------------|----------------------------------------------|---------------------------------------------------------------------------------|---------------------------------------------------------------------------------|-------------------------|
| CPBS            | 20                                           | –                                                                               | –                                                                               | 700                     |
| MPSM level 1    | 20                                           | –                                                                               | –                                                                               | 700                     |
| MPSM level 2    | 40                                           | –                                                                               | –                                                                               | 680                     |
| MPSM level 3    | 60                                           | –                                                                               | –                                                                               | 660                     |
| Spiking level 1 | 40                                           | 10                                                                              | 10                                                                              | 680                     |
| Spiking level 2 | 40                                           | 10                                                                              | 20                                                                              | 680                     |
| Spiking level 3 | 40                                           | 10                                                                              | 30                                                                              | 680                     |

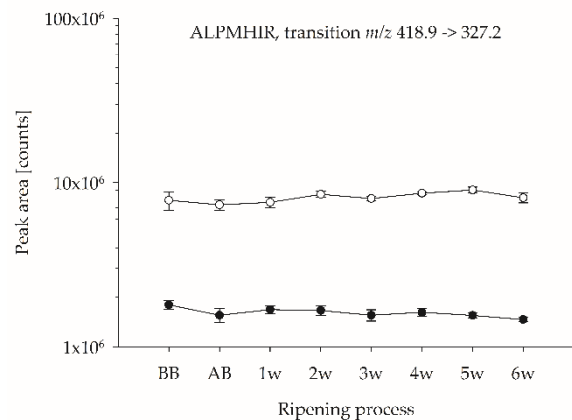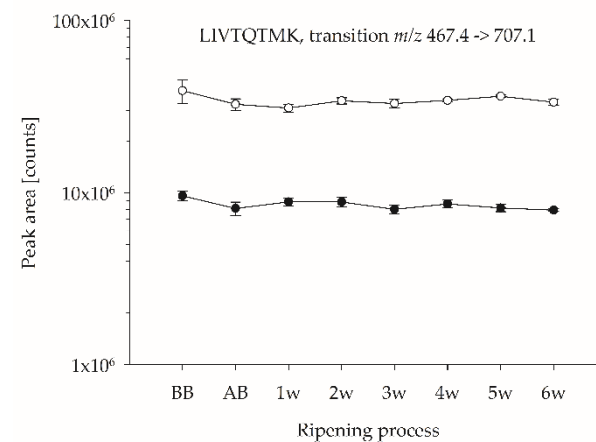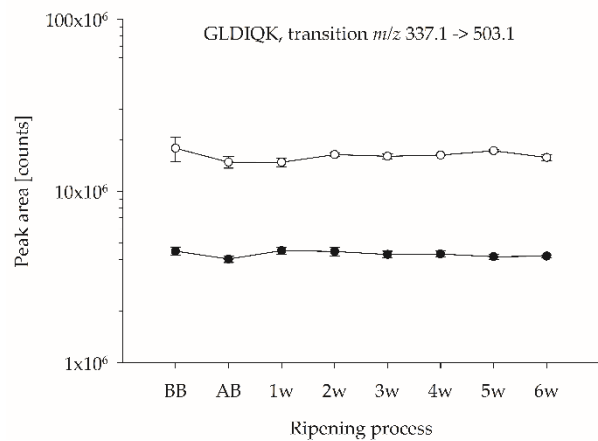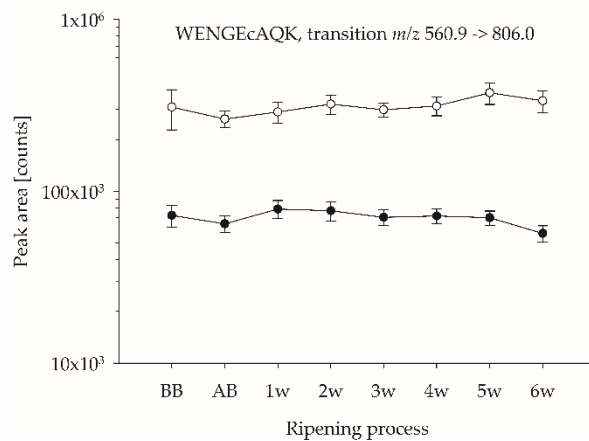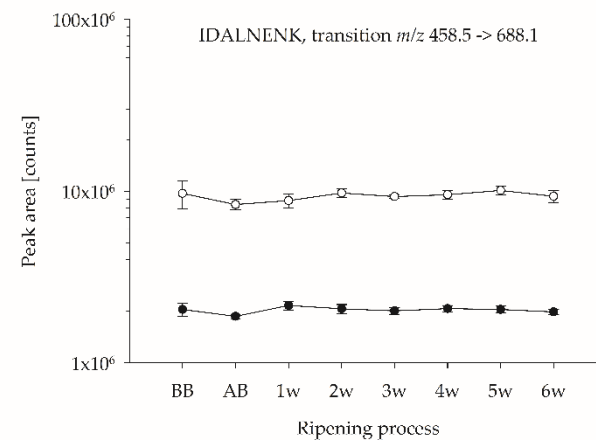

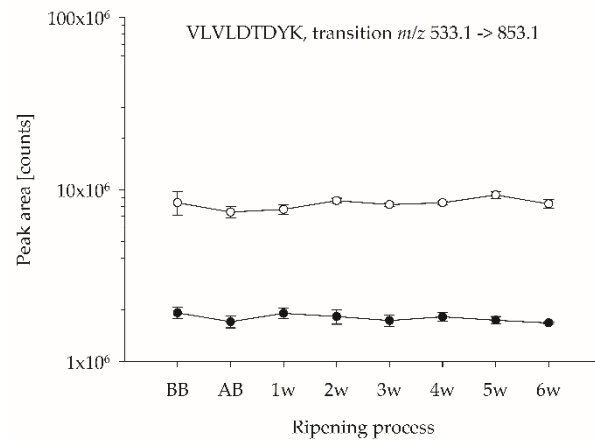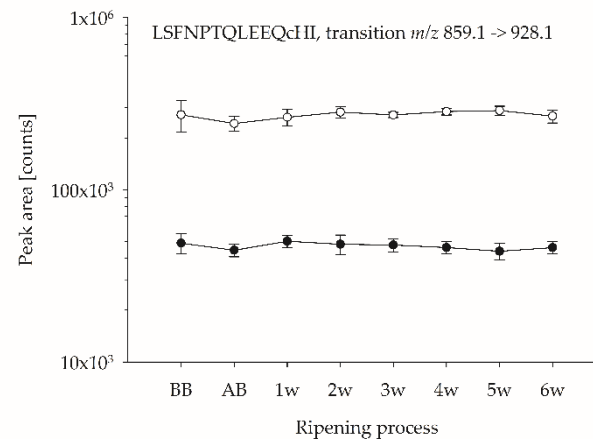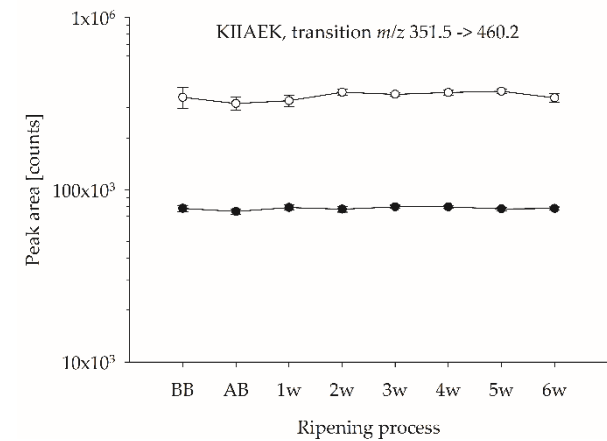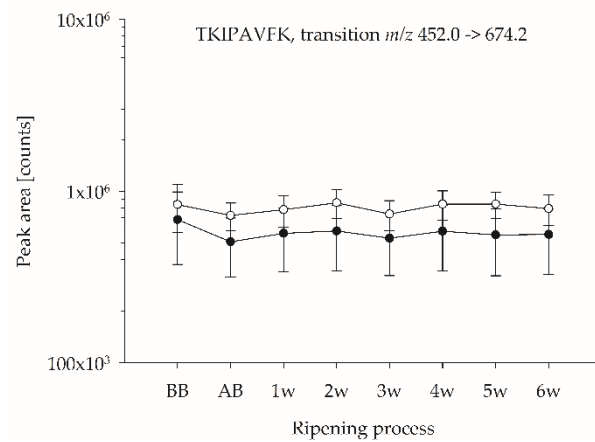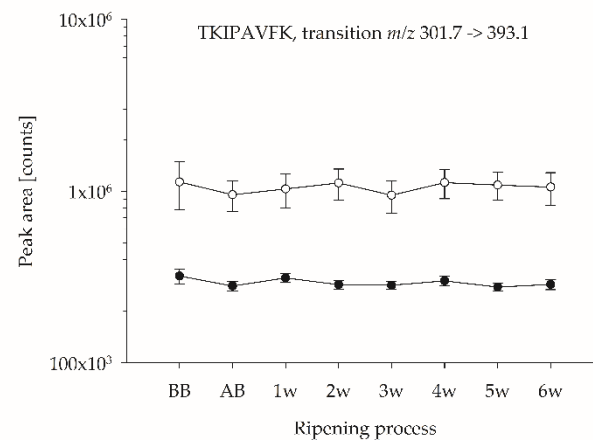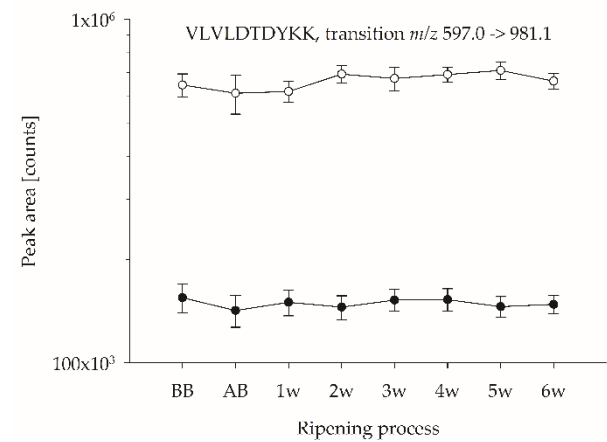

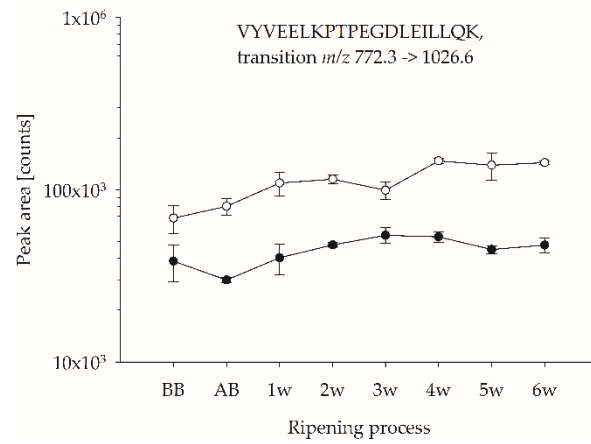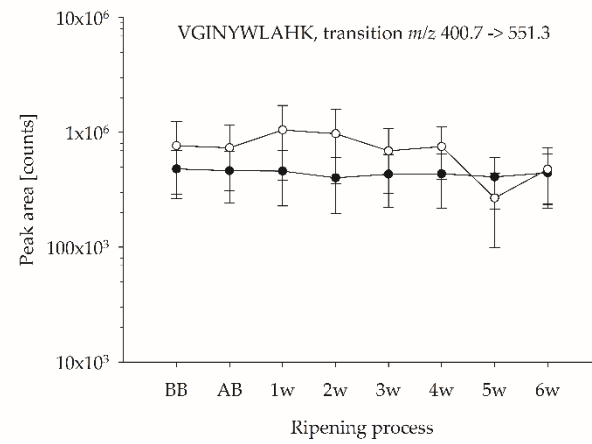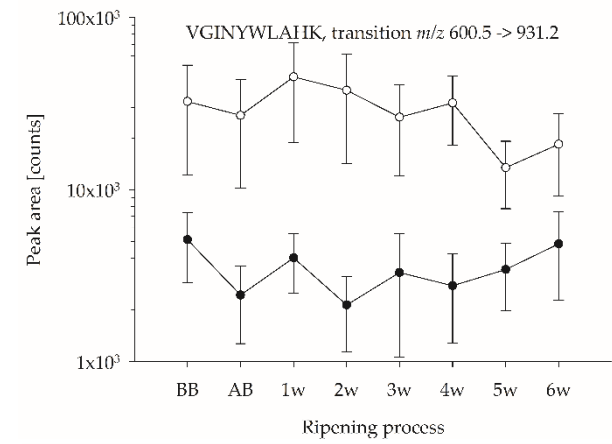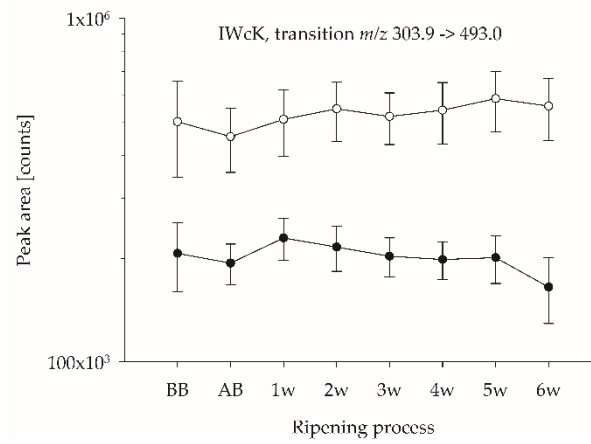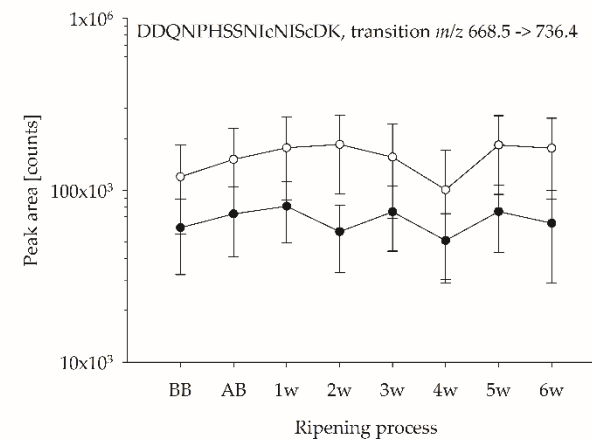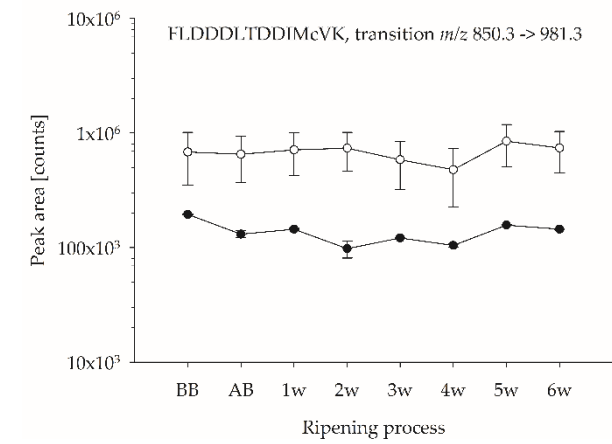

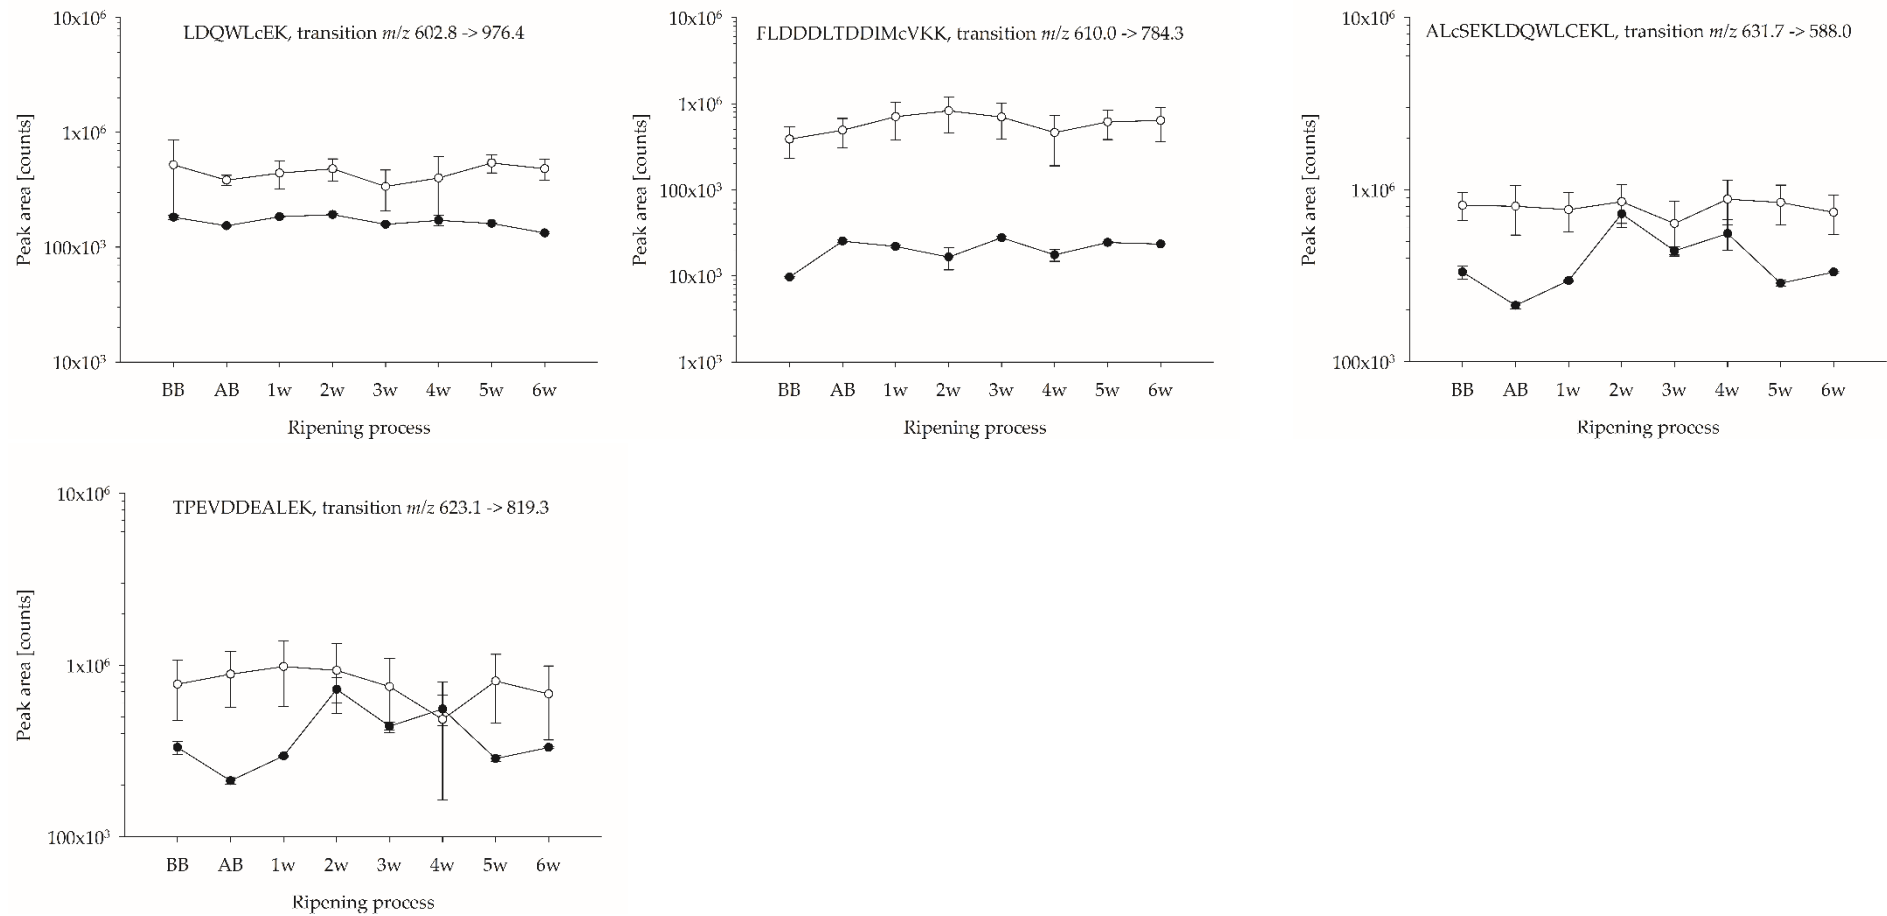

**Figure S1.** Peak areas of tryptic *in-vitro* generated PMPs for  $\alpha$ -LA or  $\beta$ -LG throughout the cheese ripening process of sample set I. For graphical representation, the y-axis was displayed logarithmically. Data were calculated as mean  $\pm$  SD of three replicate productions; (●) cheese containing 0% HH milk; (○) cheese containing 30% HH milk. Sample preparation was carried out in duplicate and measured once.

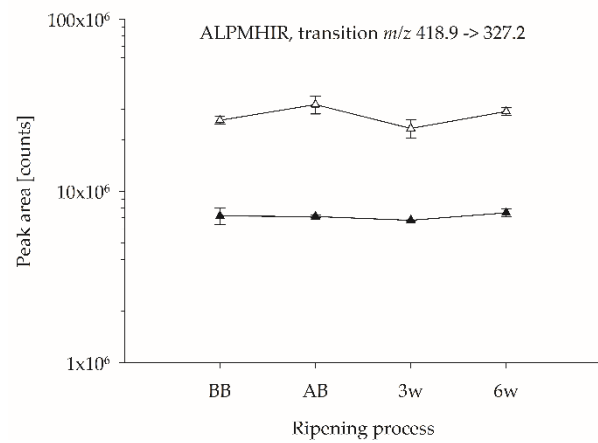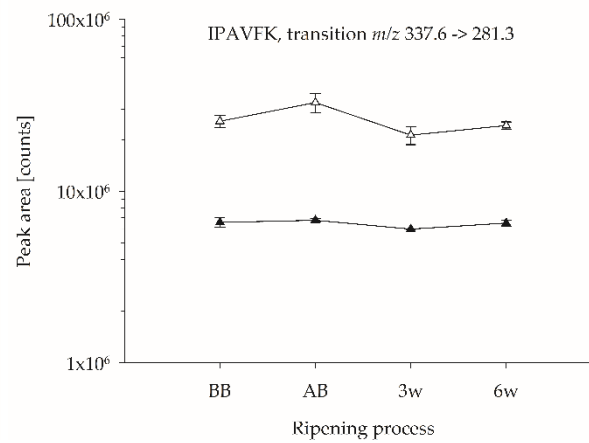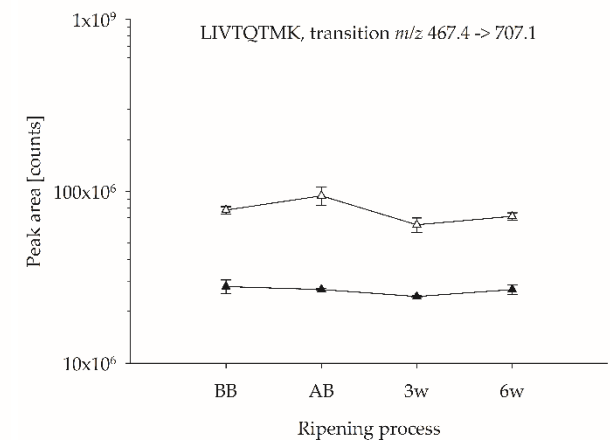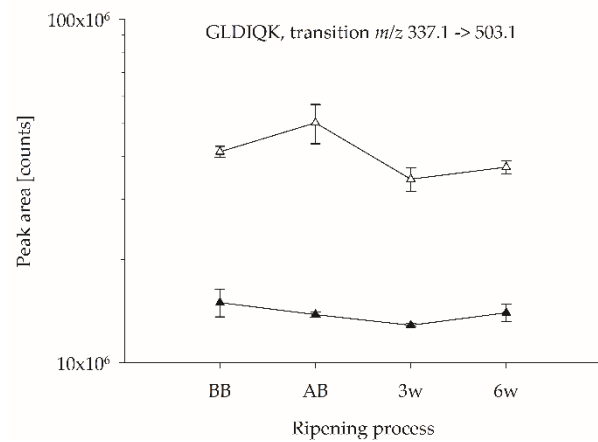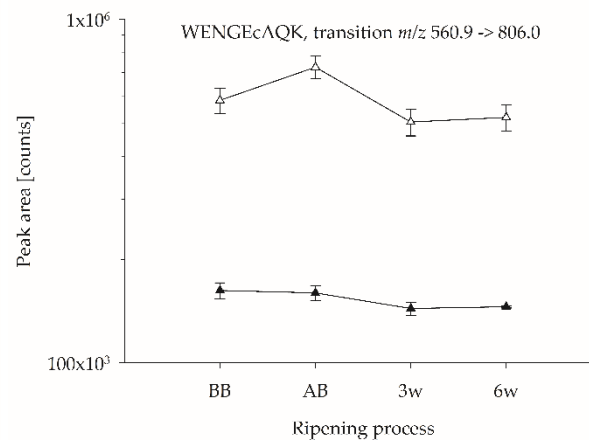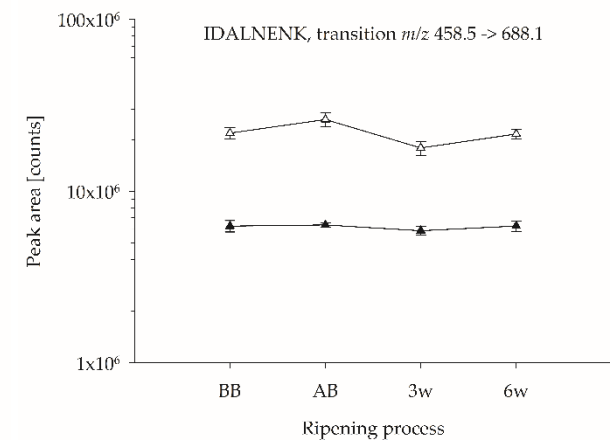

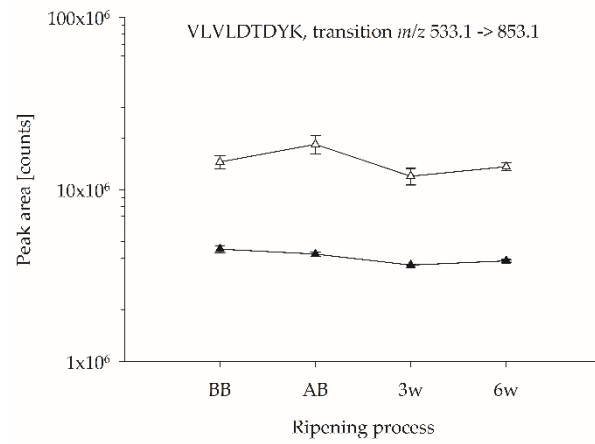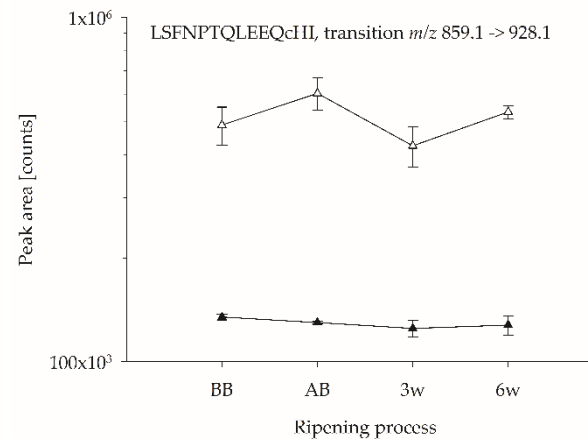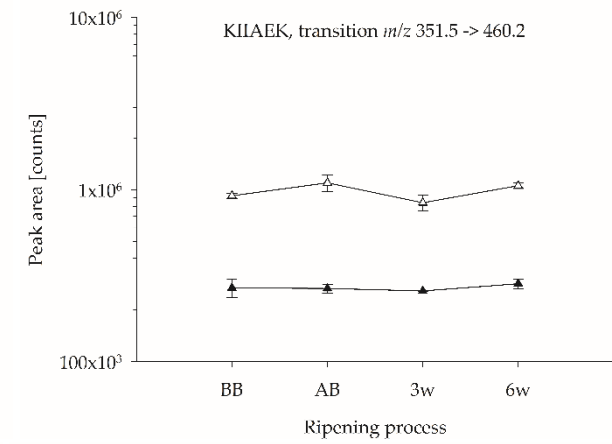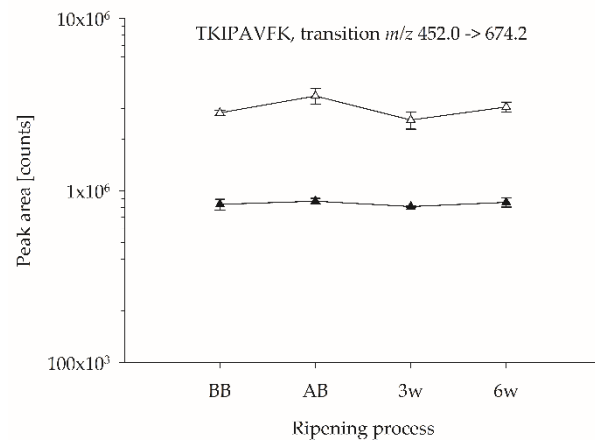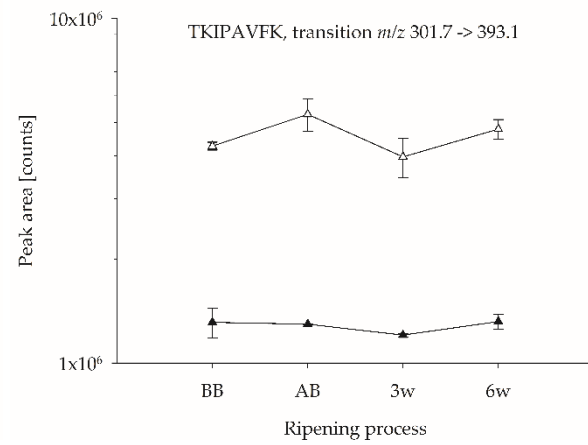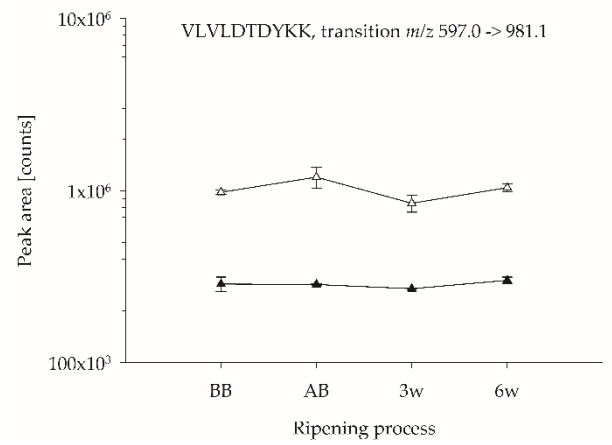



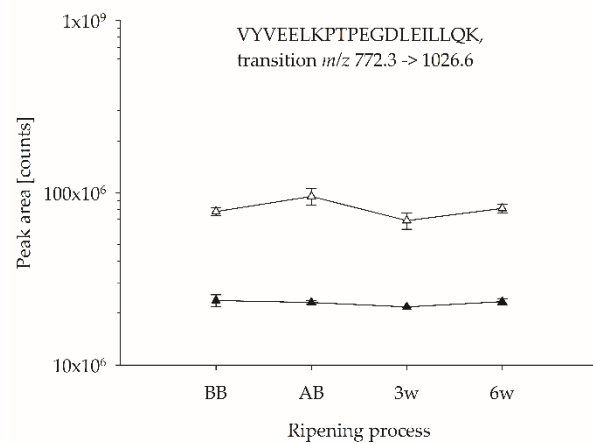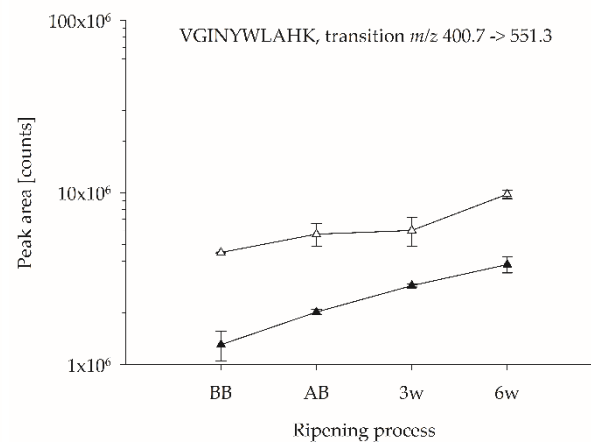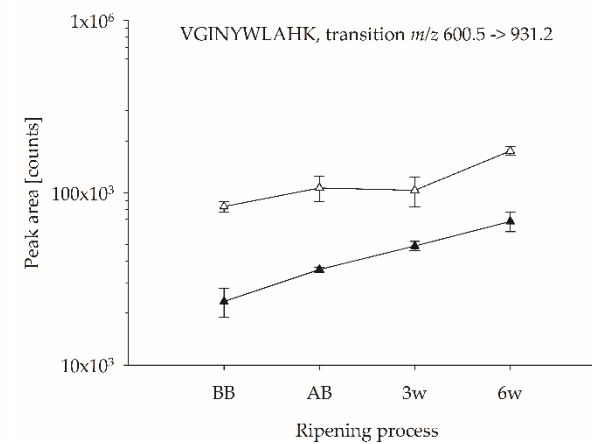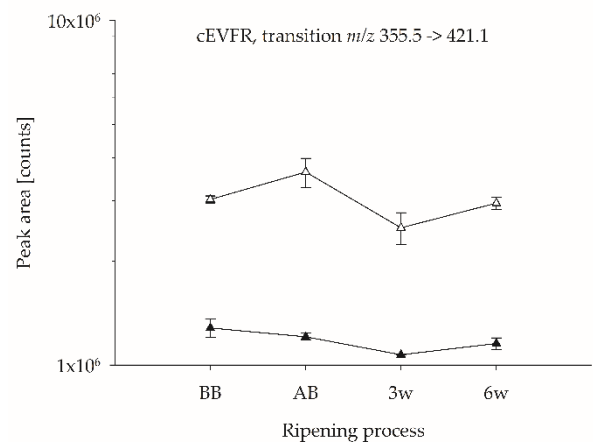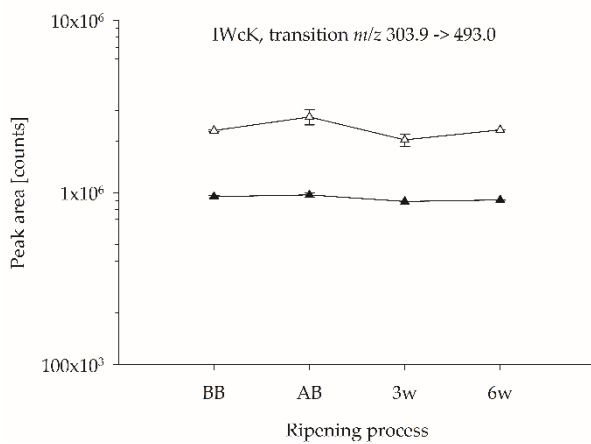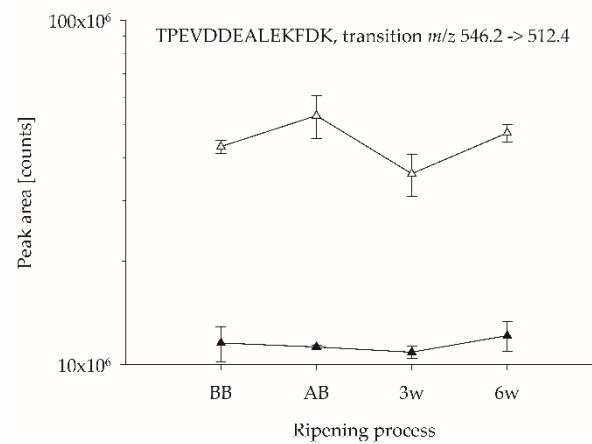

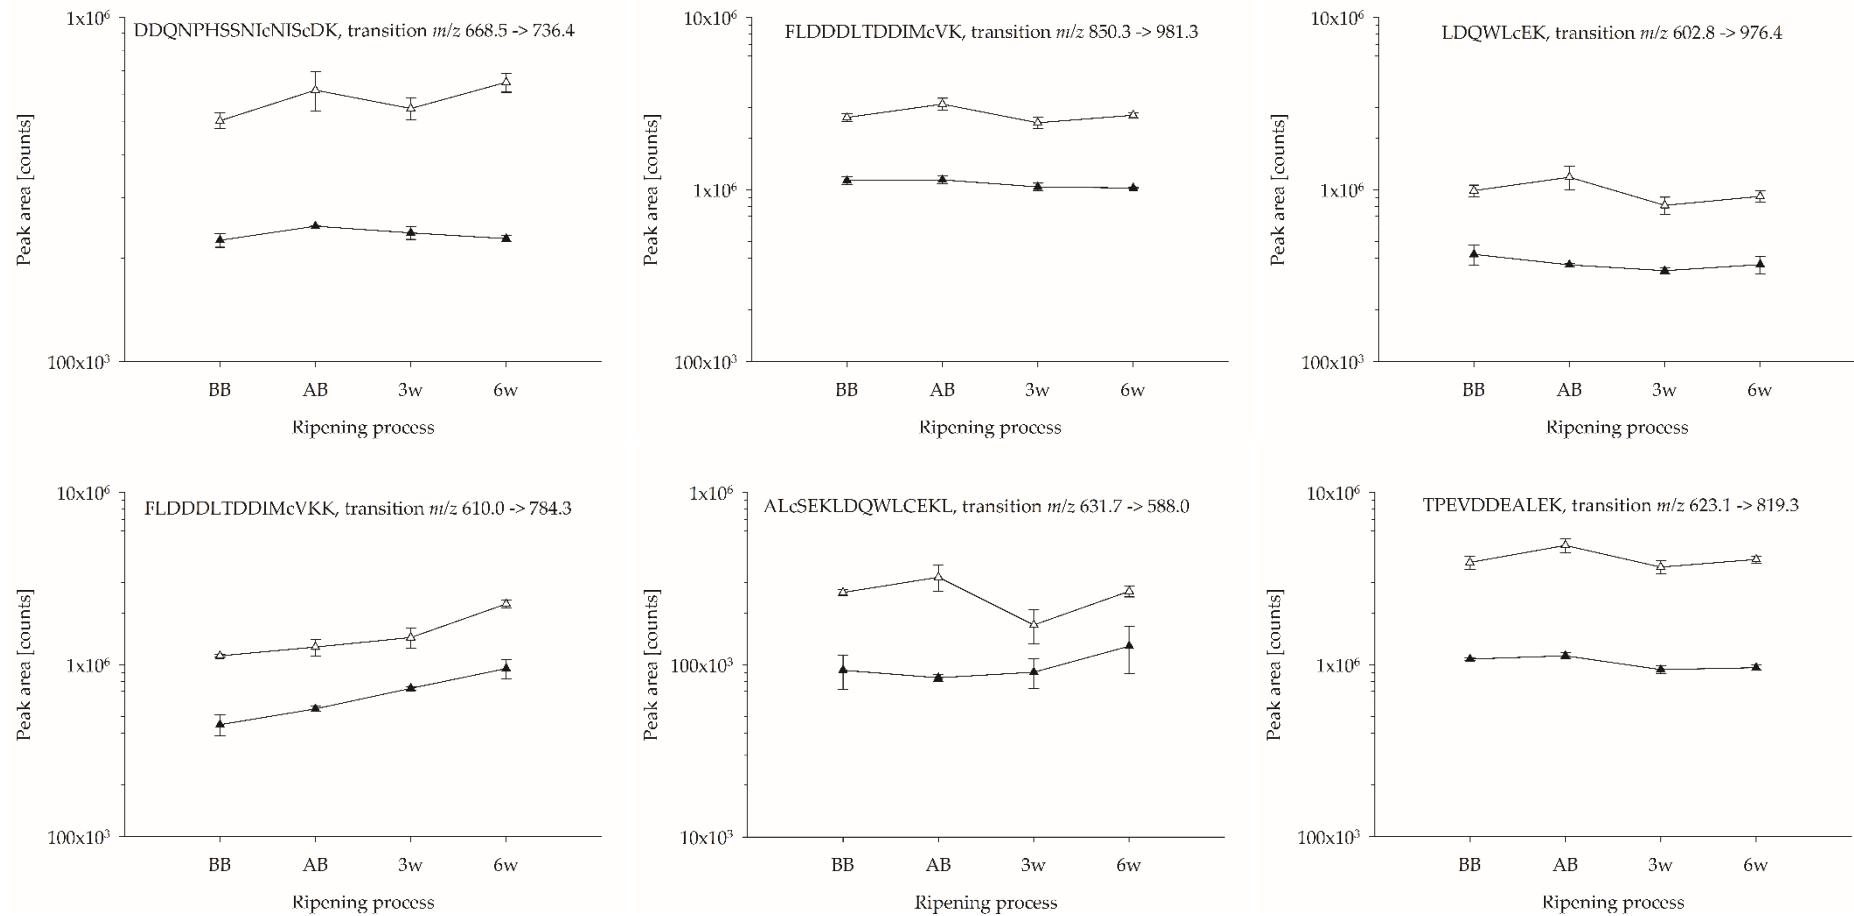

**Figure S2.** Peak areas of tryptic *in-vitro* generated PMPs for  $\alpha$ -LA or  $\beta$ -LG throughout the cheese ripening process of sample set II. For graphical representation, the y-axis was displayed logarithmically. Data were calculated as mean  $\pm$  SD of a sample preparation in duplicate and measured once; ( $\blacktriangle$ ) cheese containing 0% HH milk, ( $\triangle$ ) cheese containing 30% HH milk.

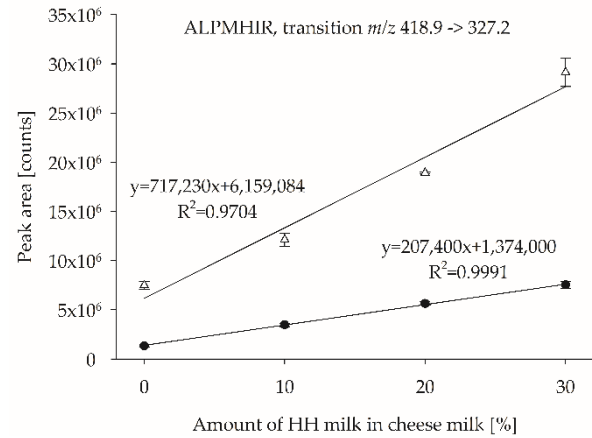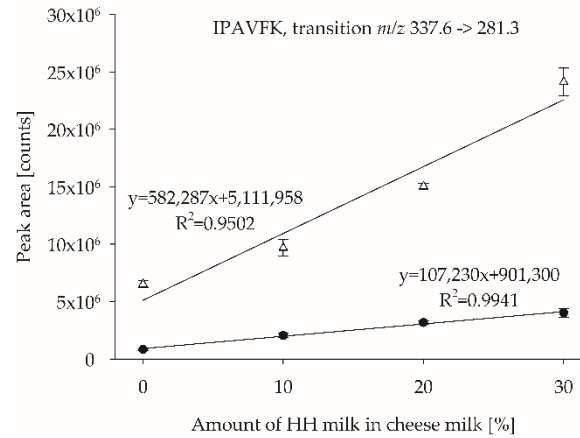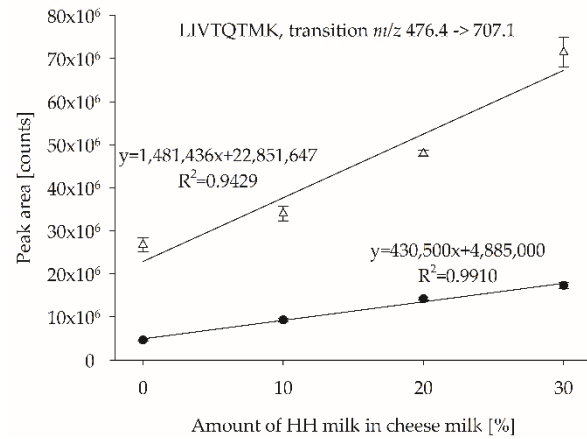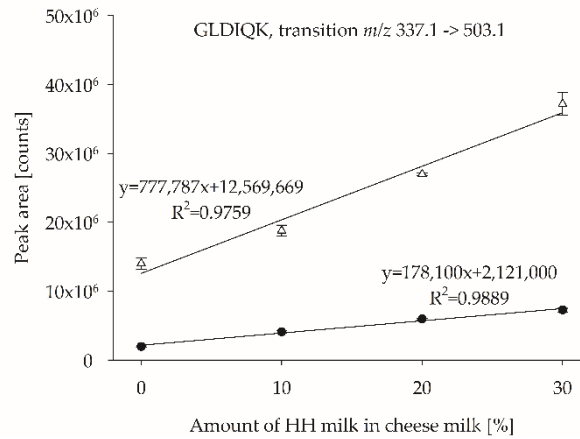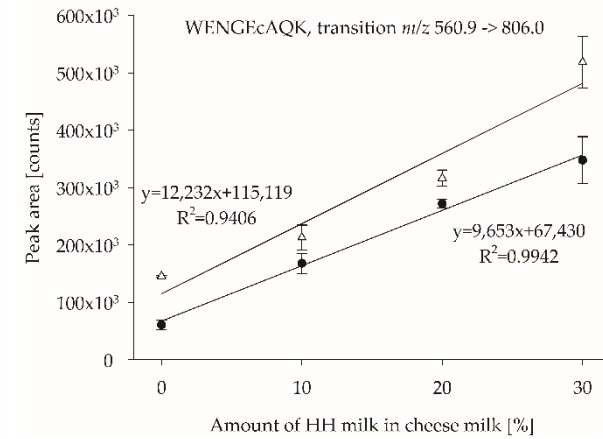

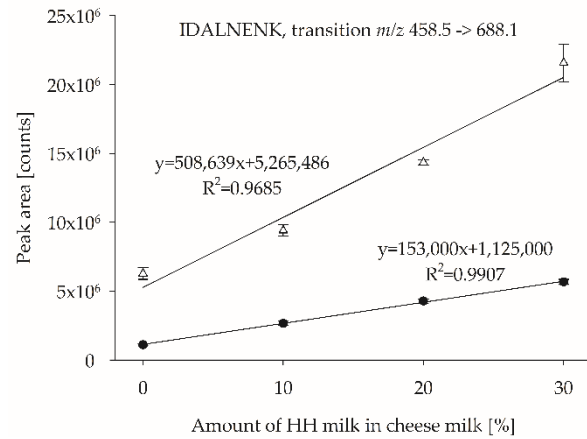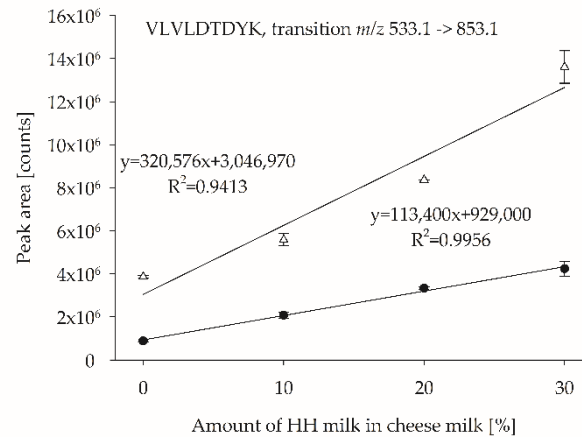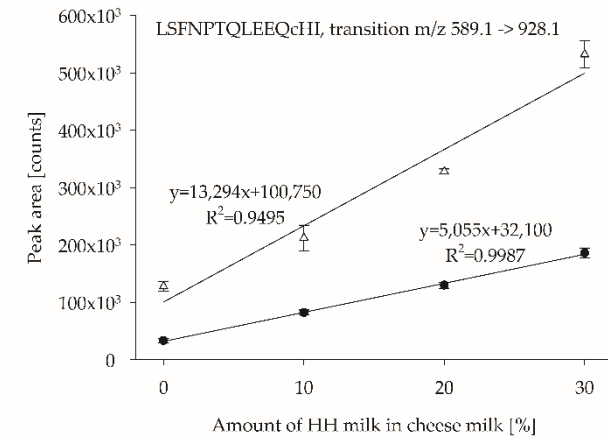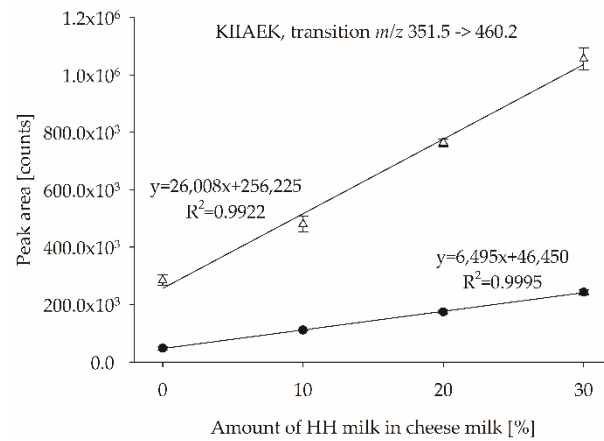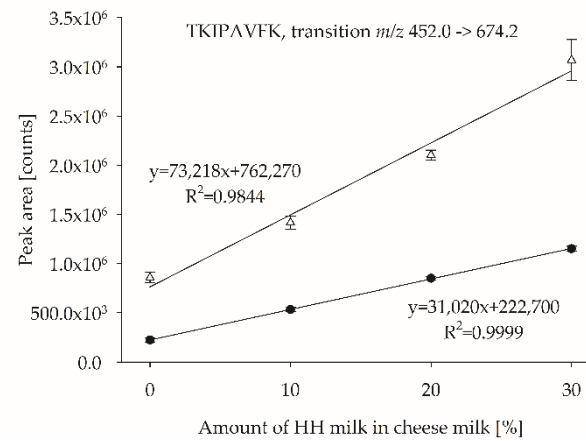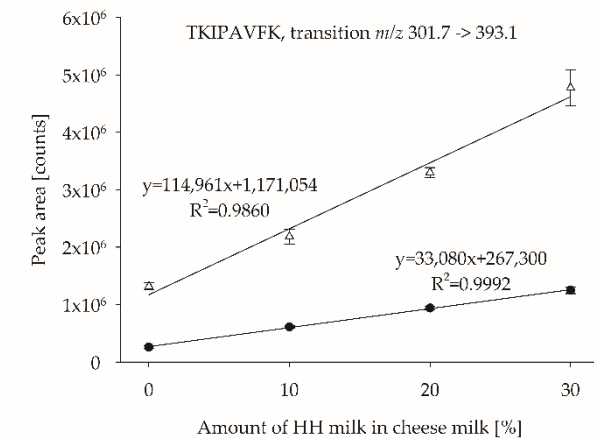

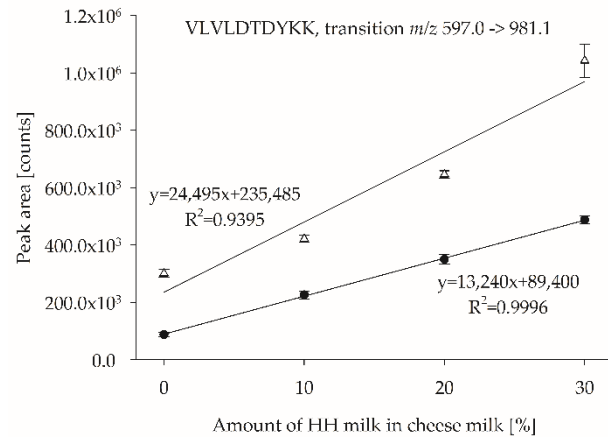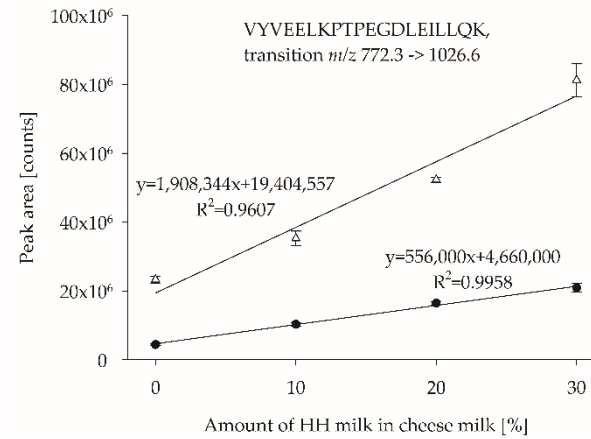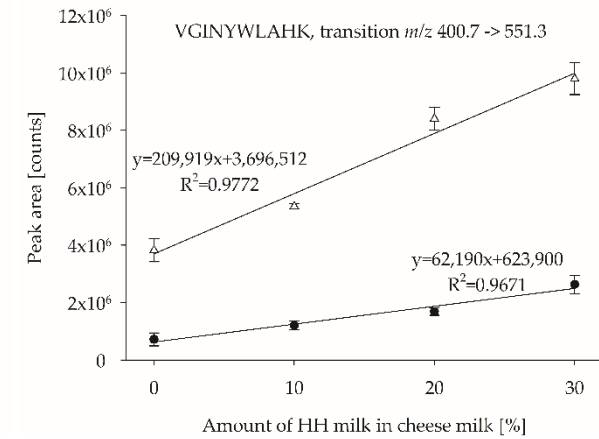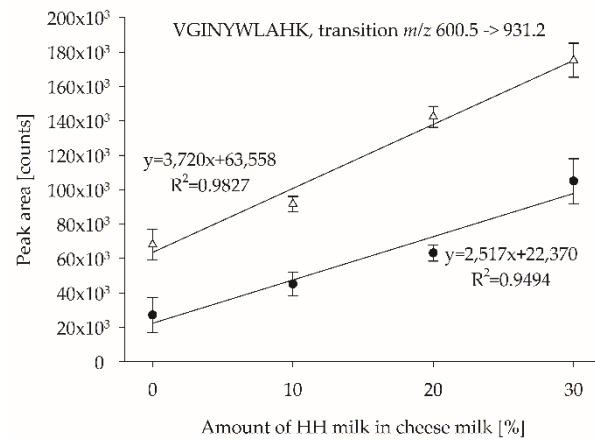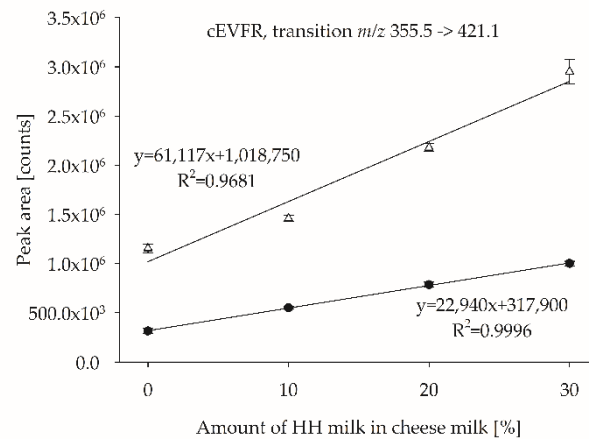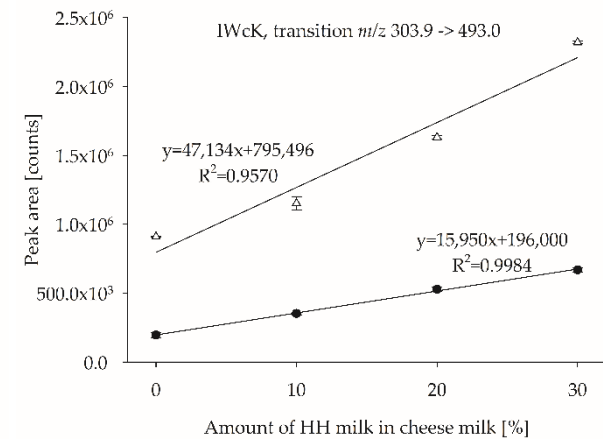

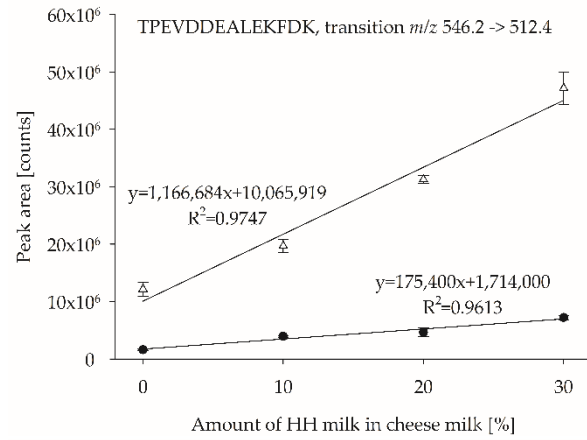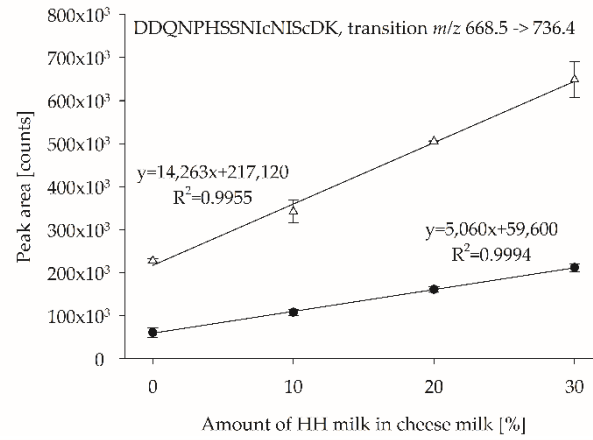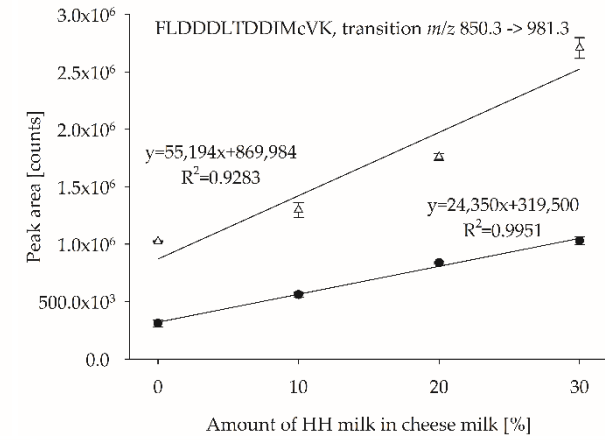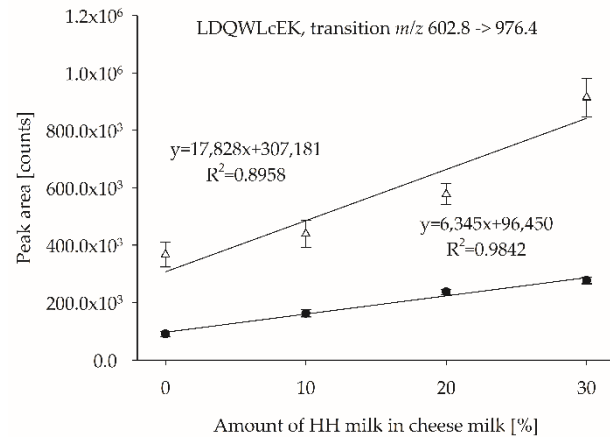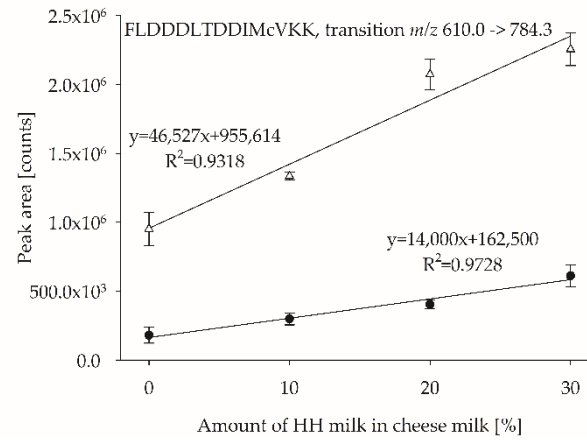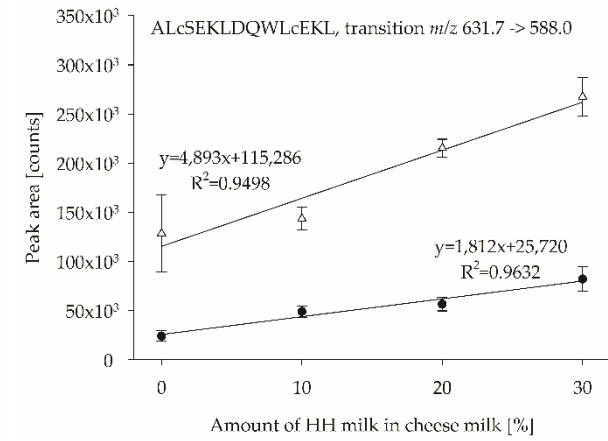

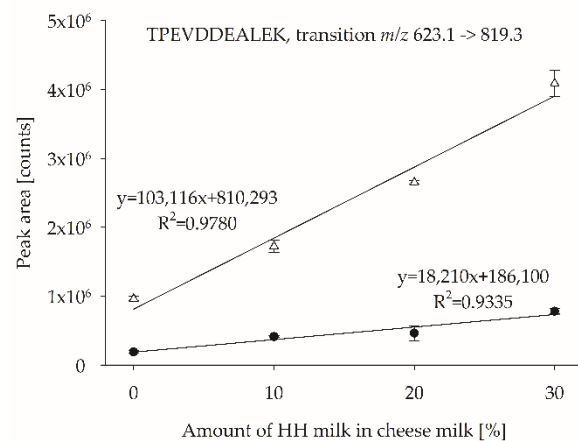

**Figure S3.** Peak areas of PMPs as a function of the amount of HH milk in cheese milk for sample set I ( $\bullet$ ) and sample set II ( $\Delta$ ).  $R^2$  stands for the coefficient of determination. Data points were calculated as mean  $\pm$  SD. Sample preparation was carried out in duplicate and measured once.
